# Supplementary material for: Annotation of soil metallic contamination hotspots via VES datasets; A case study of marble quarries in Kajiado County, SW Kenya
Source: Research Square preprint supplement (doi:10.21203/rs.3.rs-7984152/v1), 2025-11-17
Supplement: Supplementary file 1 [file 71b51aa745df555c7906ccb4.docx]

**APPENDIX A**

**RESULTS OF X-RAY FLUORESCENCE (XRF) GEOCHEMICAL ANALYSIS**

Metallic concentrations (Rocks)

**Metallic concentrations (Sediments)**

**APPENDIX A**

**RESULTS OF XRF GEOCHEMICAL ANALYSIS**

Metallic concentrations (Soils)

Metallic concentrations (Tailings)

**APPENDIX B**

**RESULTS OF COMPUTED METALLIC GEOACCUMULATION INDICES**

**APPENDIX C**

**Field Electrical VES Resistivity Data**

**VES 1 – 10**

**VES 11 – 20**
